# Supplementary material
Source: Springer Nature journal article supplement (https://www.springermedizin.de/resource/supplementary/13058_2005_1349_MOESM7_ESM.pdf/9698916)

# S-7: ZR 75 30 Karyogram

red and green lines represent +1.0 and -1.0 log<sub>2</sub> ratio scale references respectively

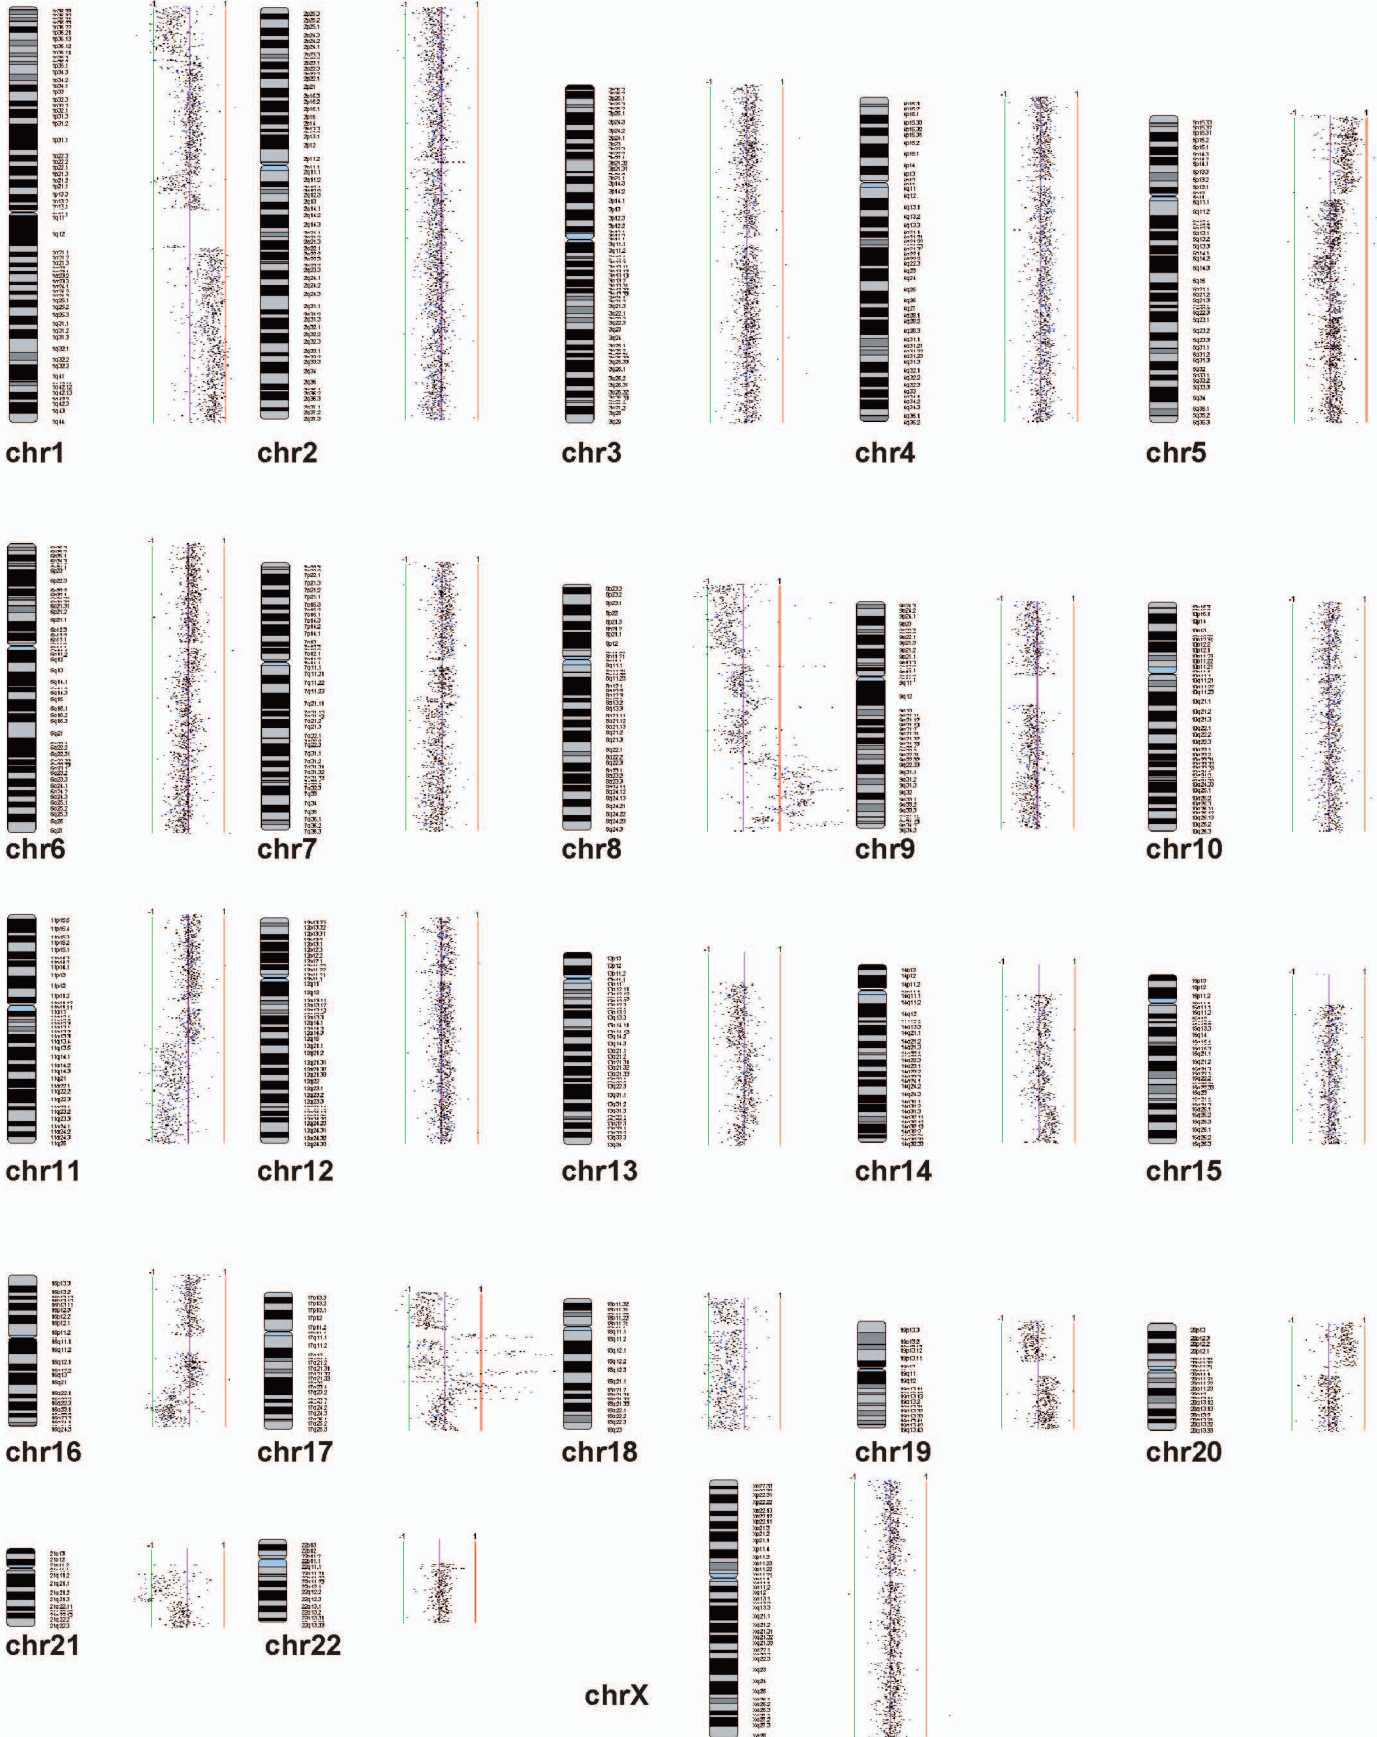

Supplement: MOESM7 [file 9698916]
